# Supplementary material for: Oscillatory Protein Expression Dynamics Endows Stem Cells with Robust Differentiation Potential
Source: PLOS journal article supplement (doi:10.1371/journal.pone.0027232), 2011-11-03

(a)

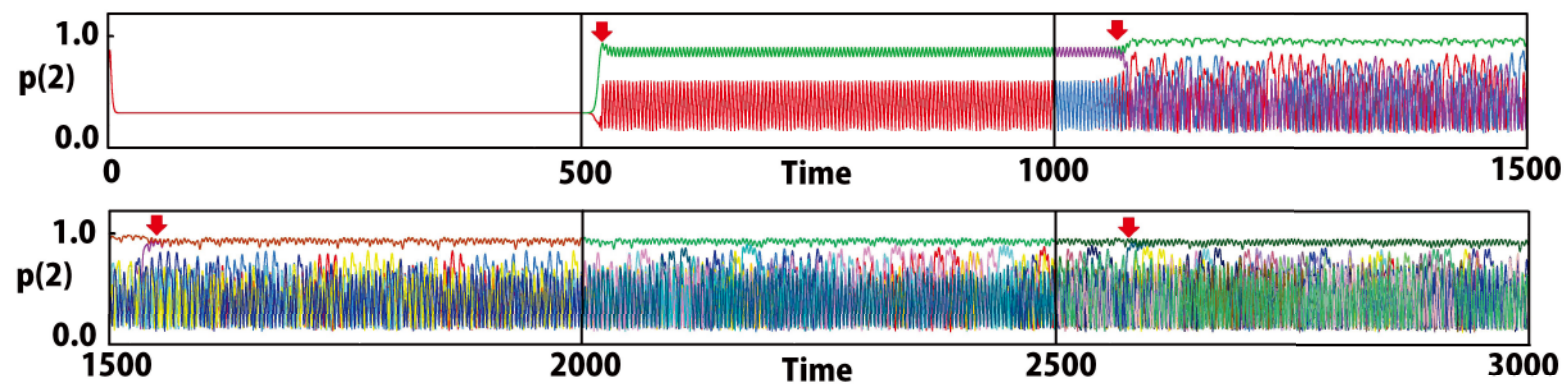

(b)

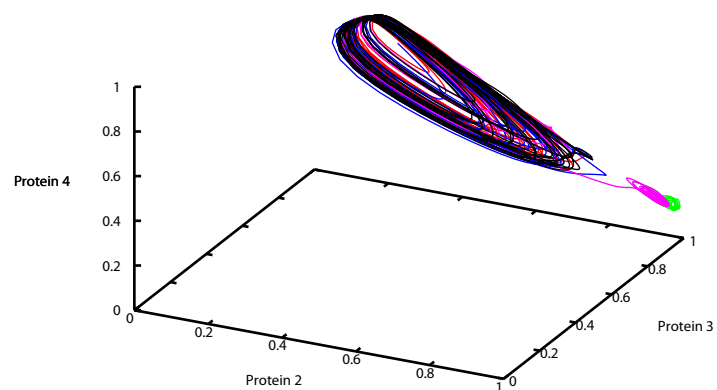

Supplement: S4 (10.1371/journal.pone.0027232.s004) [file journal.pone.0027232.s004]
